# Supplementary material
Source: PubMed Central journal article supplement (PMC9191756)
Supplement: 40272_2022_510_MOESM1_ESM.pdf [file 40272_2022_510_MOESM1_ESM.pdf]

## **The effect of alfentanil on emergence delirium following general anesthesia in children: a randomized clinical trial**

**Nan Zhao<sup>1,2,3</sup>, Jie Zeng<sup>1,2,3</sup>, Lin Fan<sup>1,2,3</sup>, Chao Zhang<sup>1,2,3</sup>, YuJia Wu<sup>1,2,3</sup>, Xin Wang<sup>1,2,3</sup>, Feng Gao<sup>1,2,3</sup>, Cong Yu<sup>1,2,3\*</sup>**

<sup>1</sup>Department of Anesthesiology, Stomatological Hospital of Chongqing Medical University, Chongqing, China.

<sup>2</sup>Chongqing Key Laboratory of Oral Diseases and Biomedical Sciences, Chongqing, China.

<sup>3</sup> Chongqing Municipal Key Laboratory of Oral Biomedical Engineering of Higher Education, Chongqing, China

**Correspondence:** Cong Yu

426 Songshi North Road, Yubei District, Chongqing, China.

**Tel:** +8613996202110

**Email:** [500158@hospital.cqmu.edu.cn](mailto:500158@hospital.cqmu.edu.cn).

Supplementary material

Pediatric Drugs, 2022

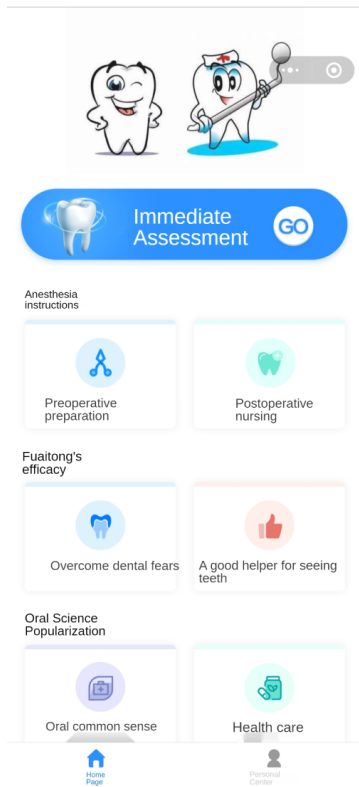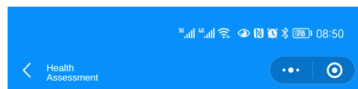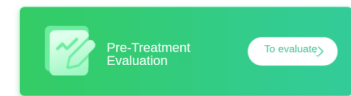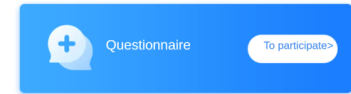

Assessment instructions in order to better provide you with medical services, please truthfully choose the answers to relevant questions.

Please improve your personal data before self-testing so that we can provide you with more accurate evaluation services.

If you want to help others fill in, please go to the personal center to fill in other people's real information first.

This service is provided by Chongqing Xilun technology.

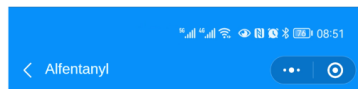

- mYPAS scoring table
- Postoperative Adverse Reactions
- PADE and Anno's score table
- Wake up restless Watch scoring table

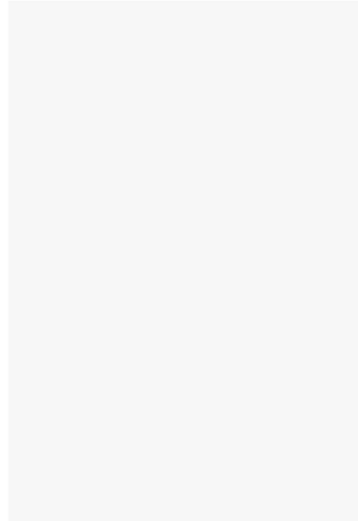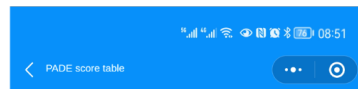

- The child makes eye contact with the caregiver
  - Extremely
  - Very much
  - Quite a bit
  - Just a little
  - Not at all
- The child's actions are purposeful
  - Extremely
  - Very much
  - Quite a bit
  - Just a little
  - Not at all
- The child is aware of his/her surroundings
  - Extremely
  - Very much
  - Quite a bit
  - Just a little
  - Not at all
- The child is restless
  - Extremely
  - Very much
  - Quite a bit
  - Just a little
  - Not at all

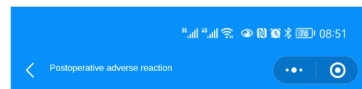

- Nausea
  - Within 6 hours
  - 7 - 24 hours
  - 25 - 48hours
  - 49 - 72hours
  - none
- Vomiting
  - Within 6 hours
  - 7 - 24 hours
  - 25 - 48hours
  - 49 - 72hours
  - none
- Itching
  - Within 6 hours
  - 7 - 24 hours
  - 25 - 48hours
  - 49 - 72hours
  - none
- Headache
  - Within 6 hours
  - 7 - 24 hours
  - 25 - 48hours
  - 49 - 72hours
  - none

Patient interface (The interface is translated to English)
